# Supplementary material for: Release of nitrite from the antitubercular nitroimidazoledrug PA-824 and analogues upon one-electron reduction in protic, non-aqueous solvent
Source: Royal Society of Chemistry journal article supplement (doi:10.1039/b915877d), 2009-11-04

Compound IV

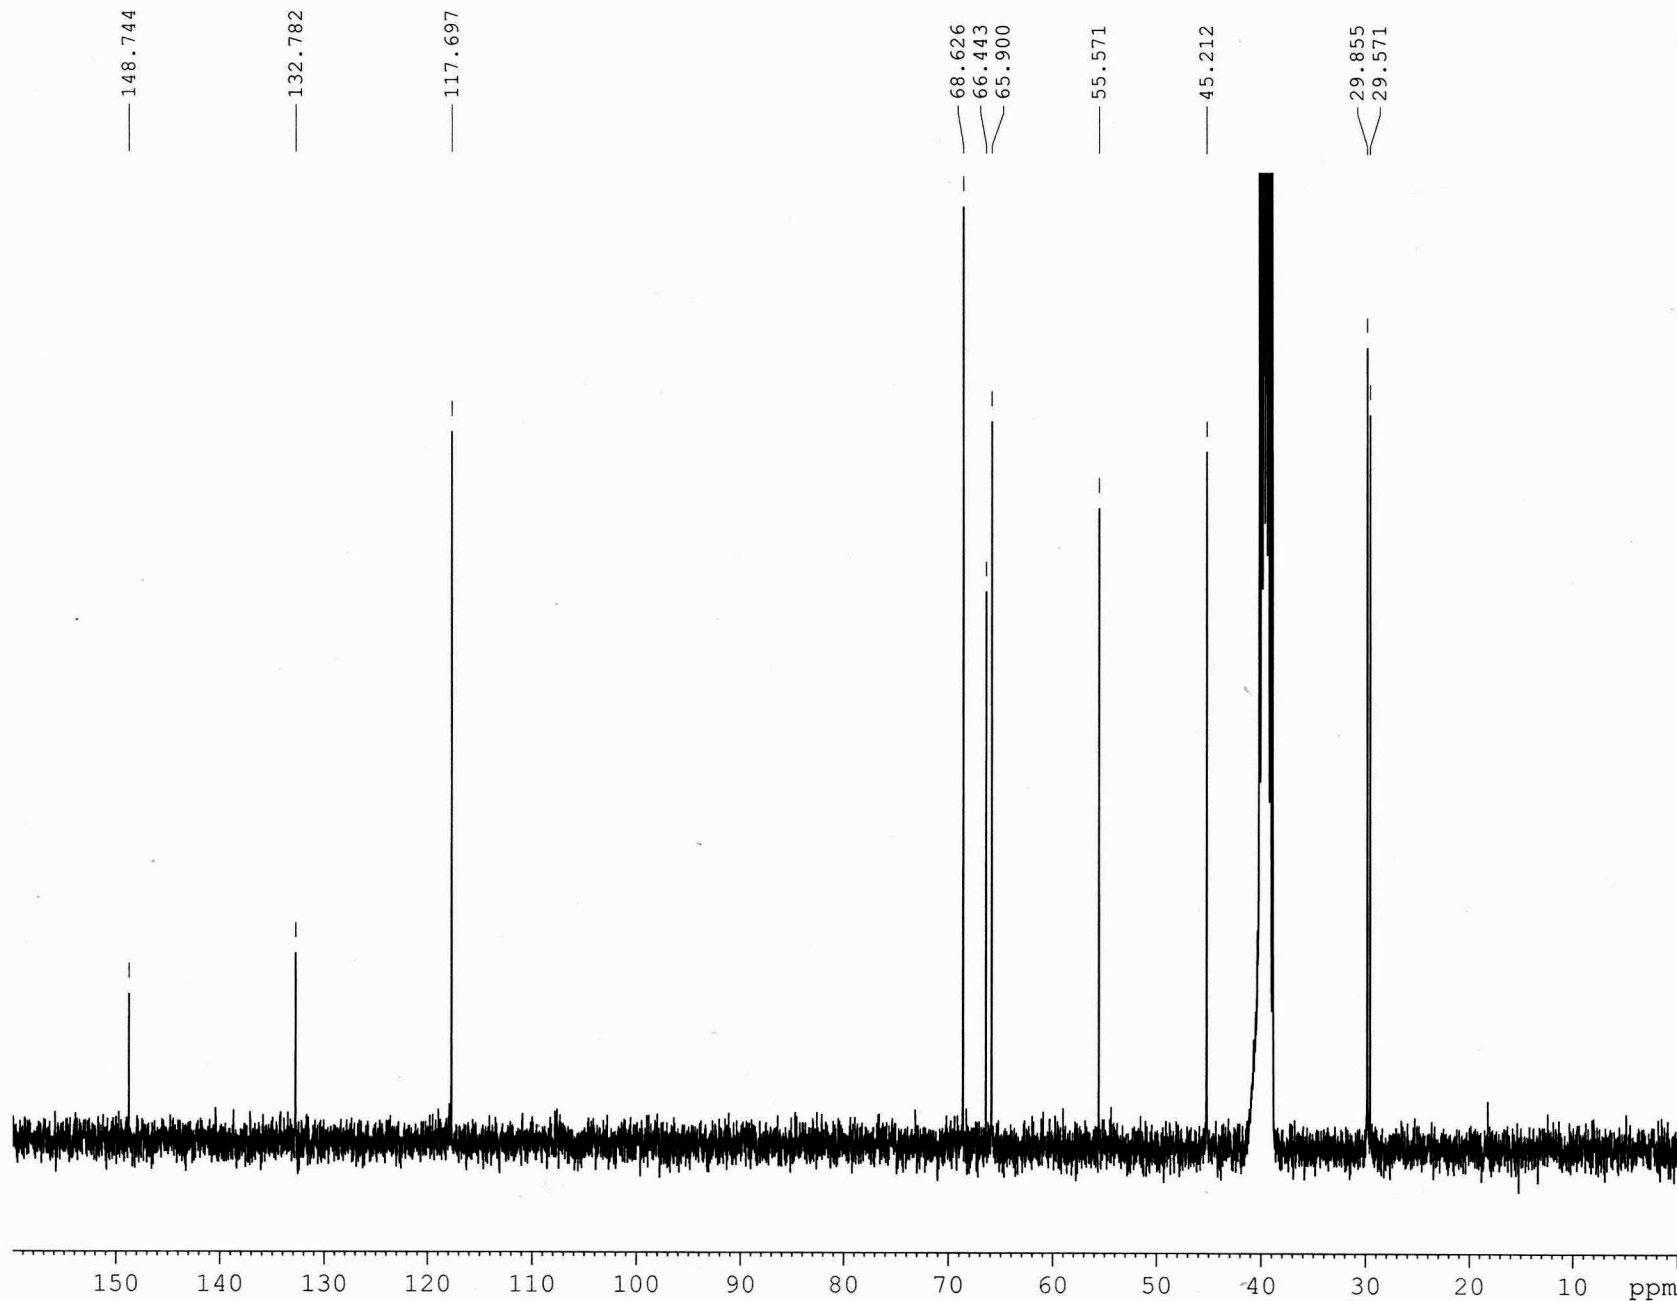

NAME Sep25-2009-FMHSacsrchplc  
EXPNO 28  
PROCNO 1  
Date 20090926  
Time 4.32  
INSTRUM spect  
PROBHD 5 mm BBO BB-1H  
PULPROG zgpg50  
TD 65536  
SOLVENT DMSO  
NS 21000  
DS 4  
SWH 26178.010 Hz  
FIDRES 0.399445 Hz  
AQ 1.2517875 sec  
RG 11585.2  
DW 19.100 usec  
DE 10.00 usec  
TE 303.0 K  
D1 0.75000000 sec  
D11 0.03000000 sec  
TDO 1

===== CHANNEL f1 =====  
NUC1 13C  
P1 10.25 usec  
PL1 -1.00 dB  
SFO1 100.6248425 MHz

===== CHANNEL f2 =====  
CPDPRG2 waltz16  
NUC2 1H  
PCPD2 100.00 usec  
PL2 -3.00 dB  
PL12 17.50 dB  
PL13 19.00 dB  
SFO2 400.1316005 MHz  
SI 32768  
SF 100.6128182 MHz  
WDW EM  
SSB 0  
LB 1.00 Hz  
GB 0  
PC 1.40

Compound IV

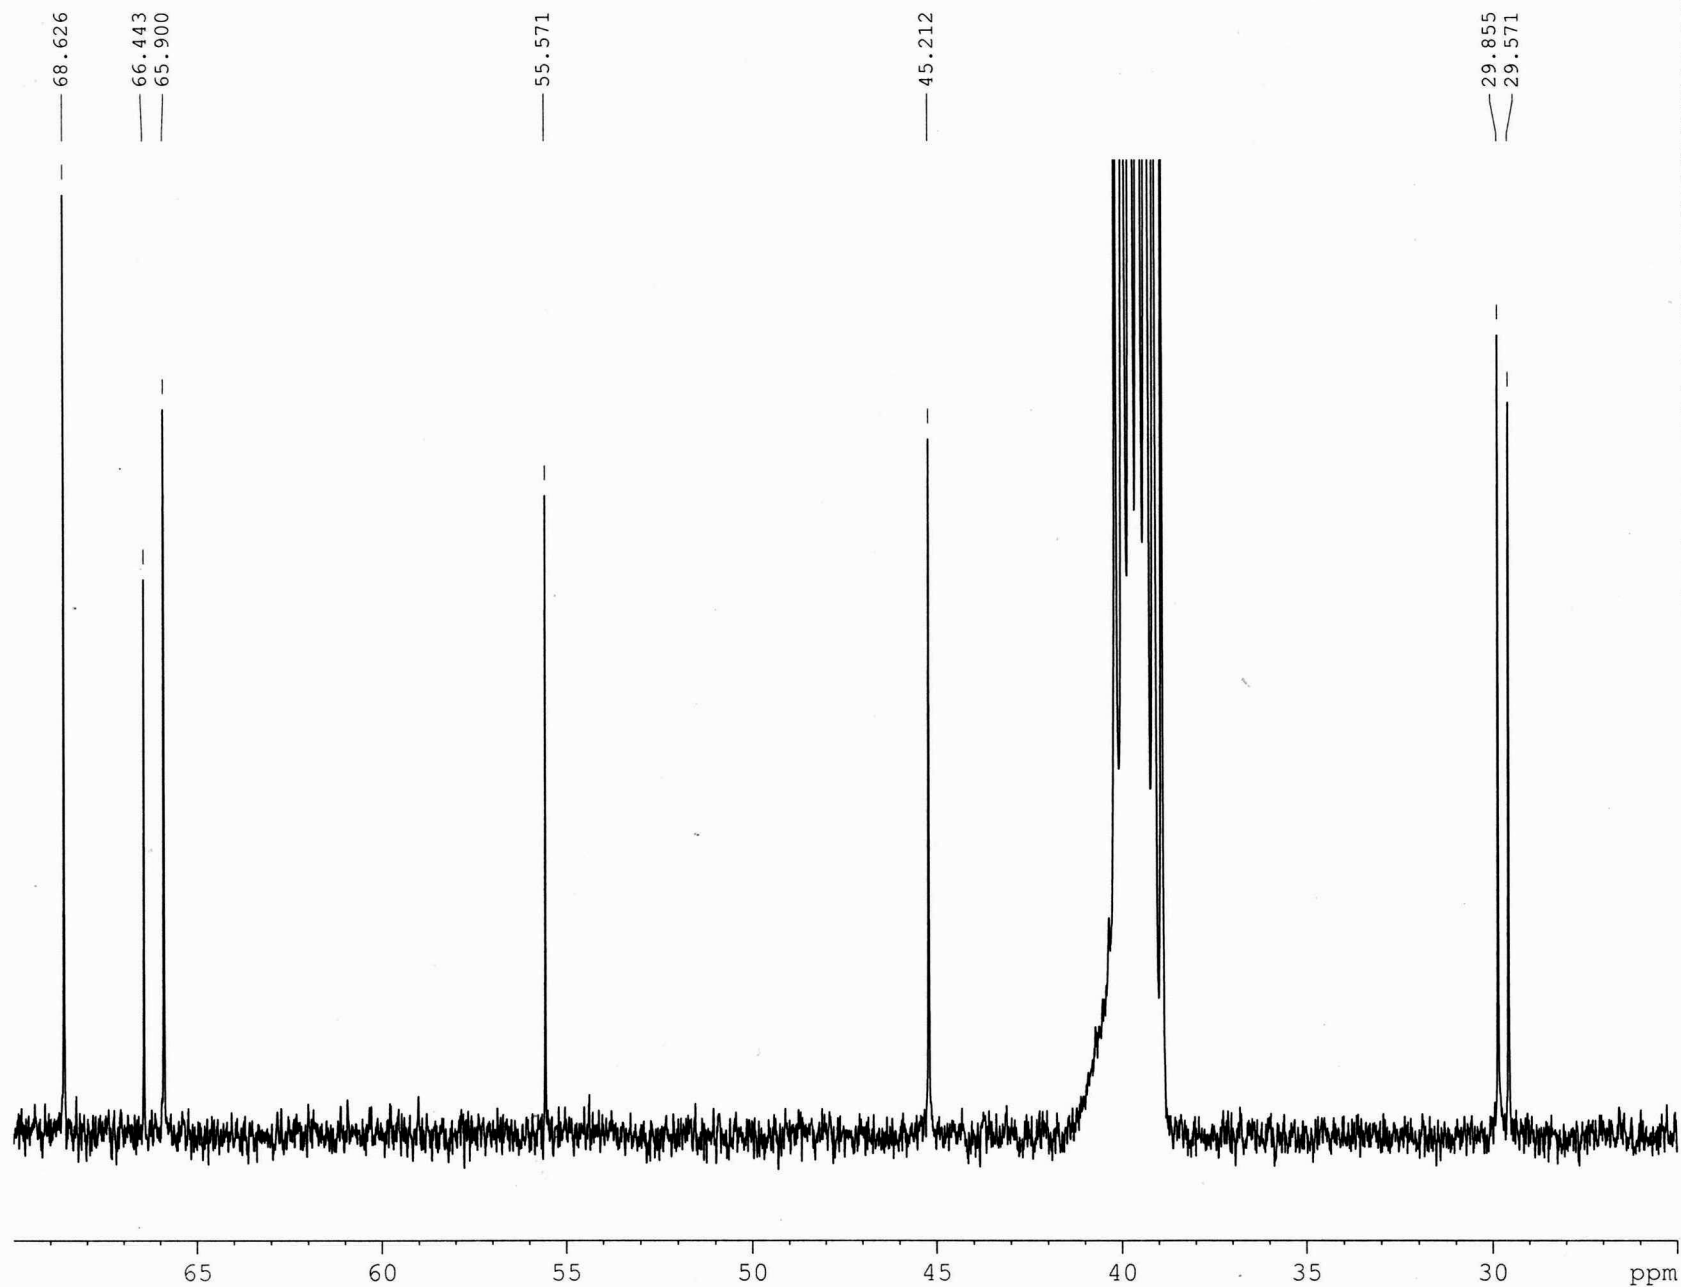

NAME Sep25-2009-FMHSacsrchplc  
EXPNO 28  
PROCNO 1  
Date 20090926  
Time 4.32  
INSTRUM spect  
PROBHD 5 mm BBO BB-1H  
PULPROG zgpg50  
TD 65536  
SOLVENT DMSO  
NS 21000  
DS 4  
SWH 26178.010 Hz  
FIDRES 0.399445 Hz  
AQ 1.2517875 sec  
RG 11585.2  
DW 19.100 usec  
DE 10.00 usec  
TE 303.0 K  
D1 0.75000000 sec  
D11 0.03000000 sec  
TD0 1

===== CHANNEL f1 =====  
NUC1 13C  
P1 10.25 usec  
PL1 -1.00 dB  
SFO1 100.6248425 MHz

===== CHANNEL f2 =====  
CPDPRG2 waltz16  
NUC2 1H  
PCPD2 100.00 usec  
PL2 -3.00 dB  
PL12 17.50 dB  
PL13 19.00 dB  
SFO2 400.1316005 MHz  
SI 32768  
SF 100.6128182 MHz  
WDW EM  
SSB 0  
LB 1.00 Hz  
GB 0  
PC 1.40

Compound IV

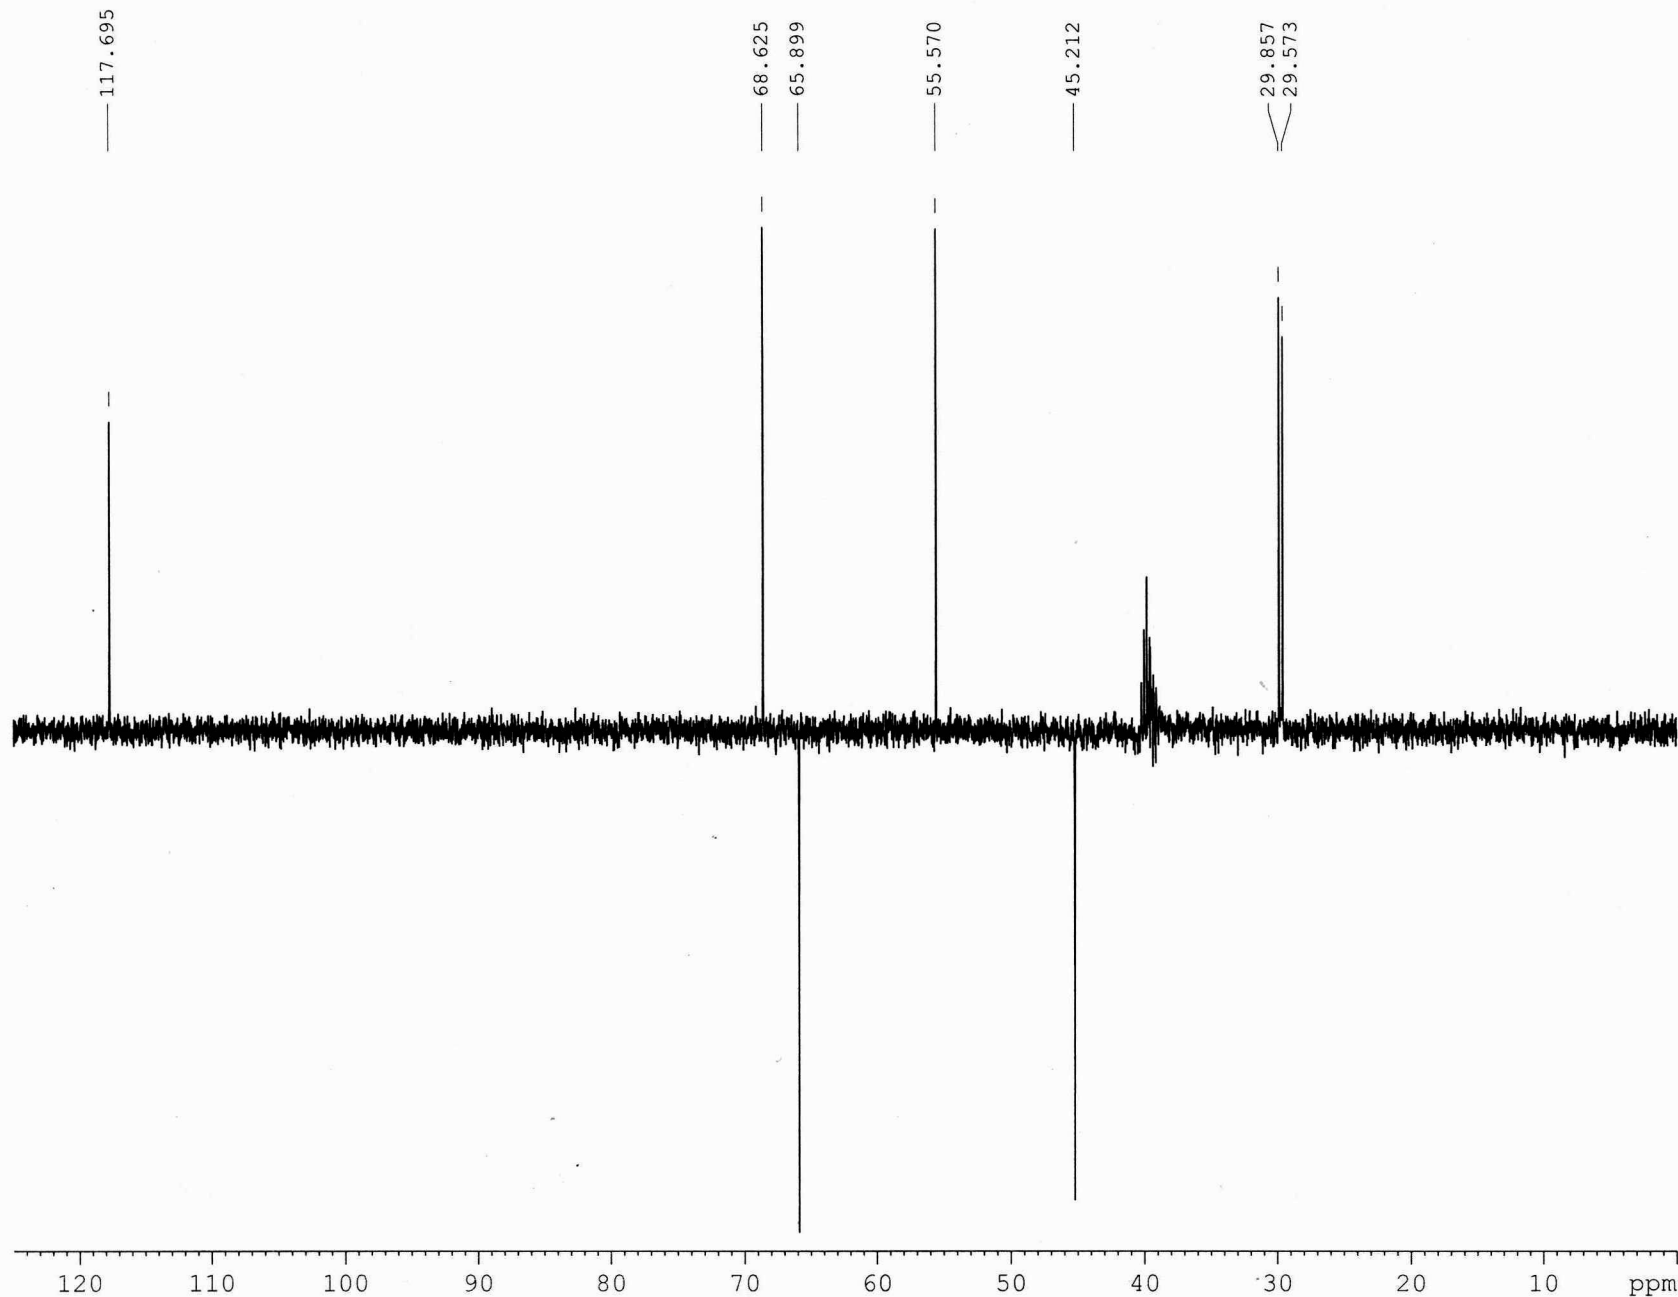

```

NAME      Sep25-2009-FMHsacsrchplc
EXPNO      29
PROCNO      1
Date_      20090926
Time       15.55
INSTRUM     spect
PROBHD      5 mm BBO BB-1H
PULPROG     dept135
TD          65536
SOLVENT     DMSO
NS          12000
DS           4
SWH          23980.814 Hz
FIDRES       0.365918 Hz
AQ           1.3664756 sec
RG           13004
DW           20.850 usec
DE           10.00 usec
TE           303.0 K
CNST2        145.0000000
D1           2.00000000 sec
D2           0.00344828 sec
D12          0.00002000 sec
TD0          1

===== CHANNEL f1 =====
NUC1         13C
P1           10.25 usec
P2           20.50 usec
PL1          -1.00 dB
SFO1         100.6228298 MHz

===== CHANNEL f2 =====
CPDPRG2      waltz16
NUC2         1H
P3           9.50 usec
P4           19.00 usec
PCPD2        100.00 usec
PL2          -3.00 dB
PL12         17.50 dB
SFO2         400.1316005 MHz
SI           32768
SF           100.6128182 MHz
WDW          EM
SSB          0
LB           1.00 Hz
GB           0
PC           1.40
    
```

Compound IV

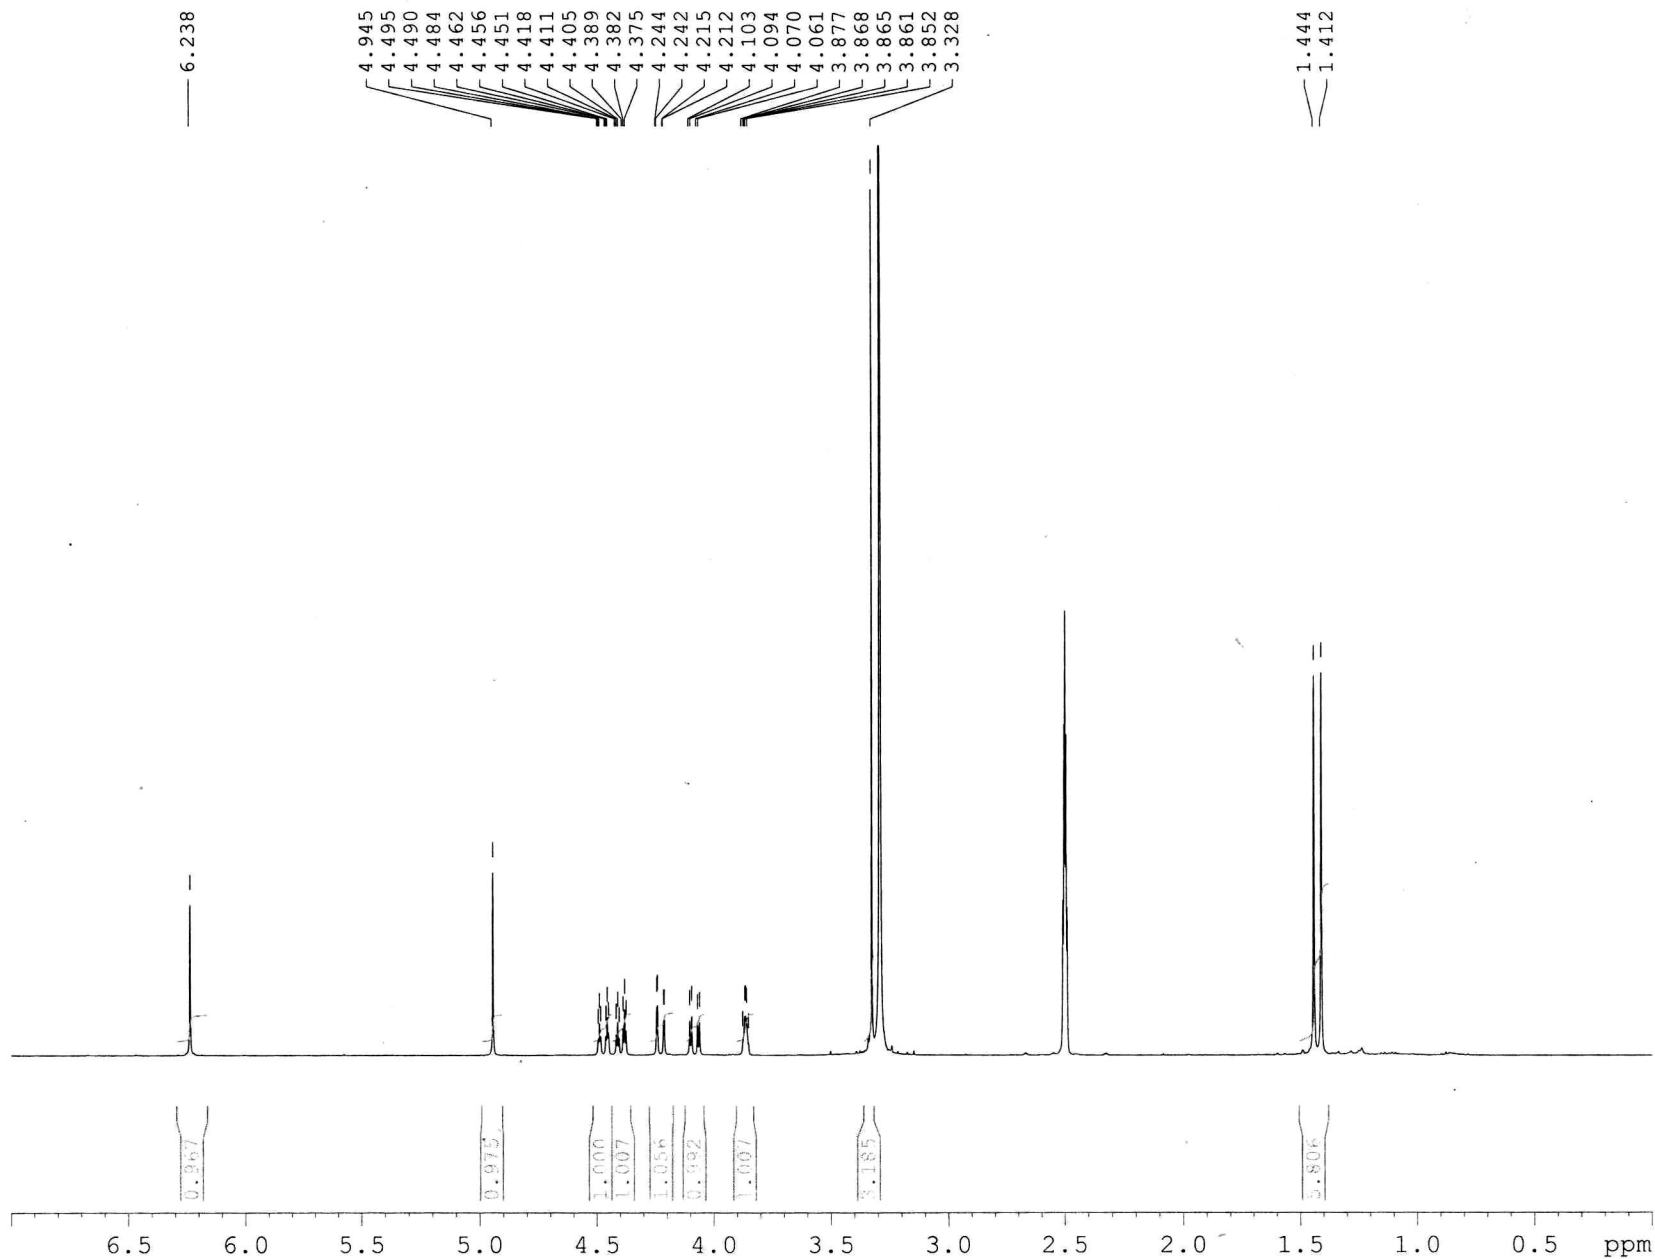

NAME Sep25-2009-FMHSacsrchpic  
EXPNO 7  
PROCNO 4  
Date\_ 20090925  
Time 10.15  
INSTRUM spect  
PROBHD 5 mm BBO BB-1H  
PULPROG zg30  
TD 65536  
SOLVENT DMSO  
NS 64  
DS 2  
SWH 8389.262 Hz  
FIDRES 0.128010 Hz  
AQ 3.9059956 sec  
RG 456.1  
DW 59.600 usec  
DE 10.00 usec  
TE 303.0 K  
D1 2.00000000 sec  
TD0 1

===== CHANNEL f1 =====  
NUC1 1H  
P1 9.50 usec  
PL1 -3.00 dB  
SFO1 400.1334011 MHz  
SI 32768  
SF 400.1300025 MHz  
WDW EM  
SSB 0  
LB 0.30 Hz  
GB 0  
PC 1.00

c:\user\FMHS-acsrchplc\Sep25-2009-FMHSacsrchplc\7\1  
Integral regions #3 to #3

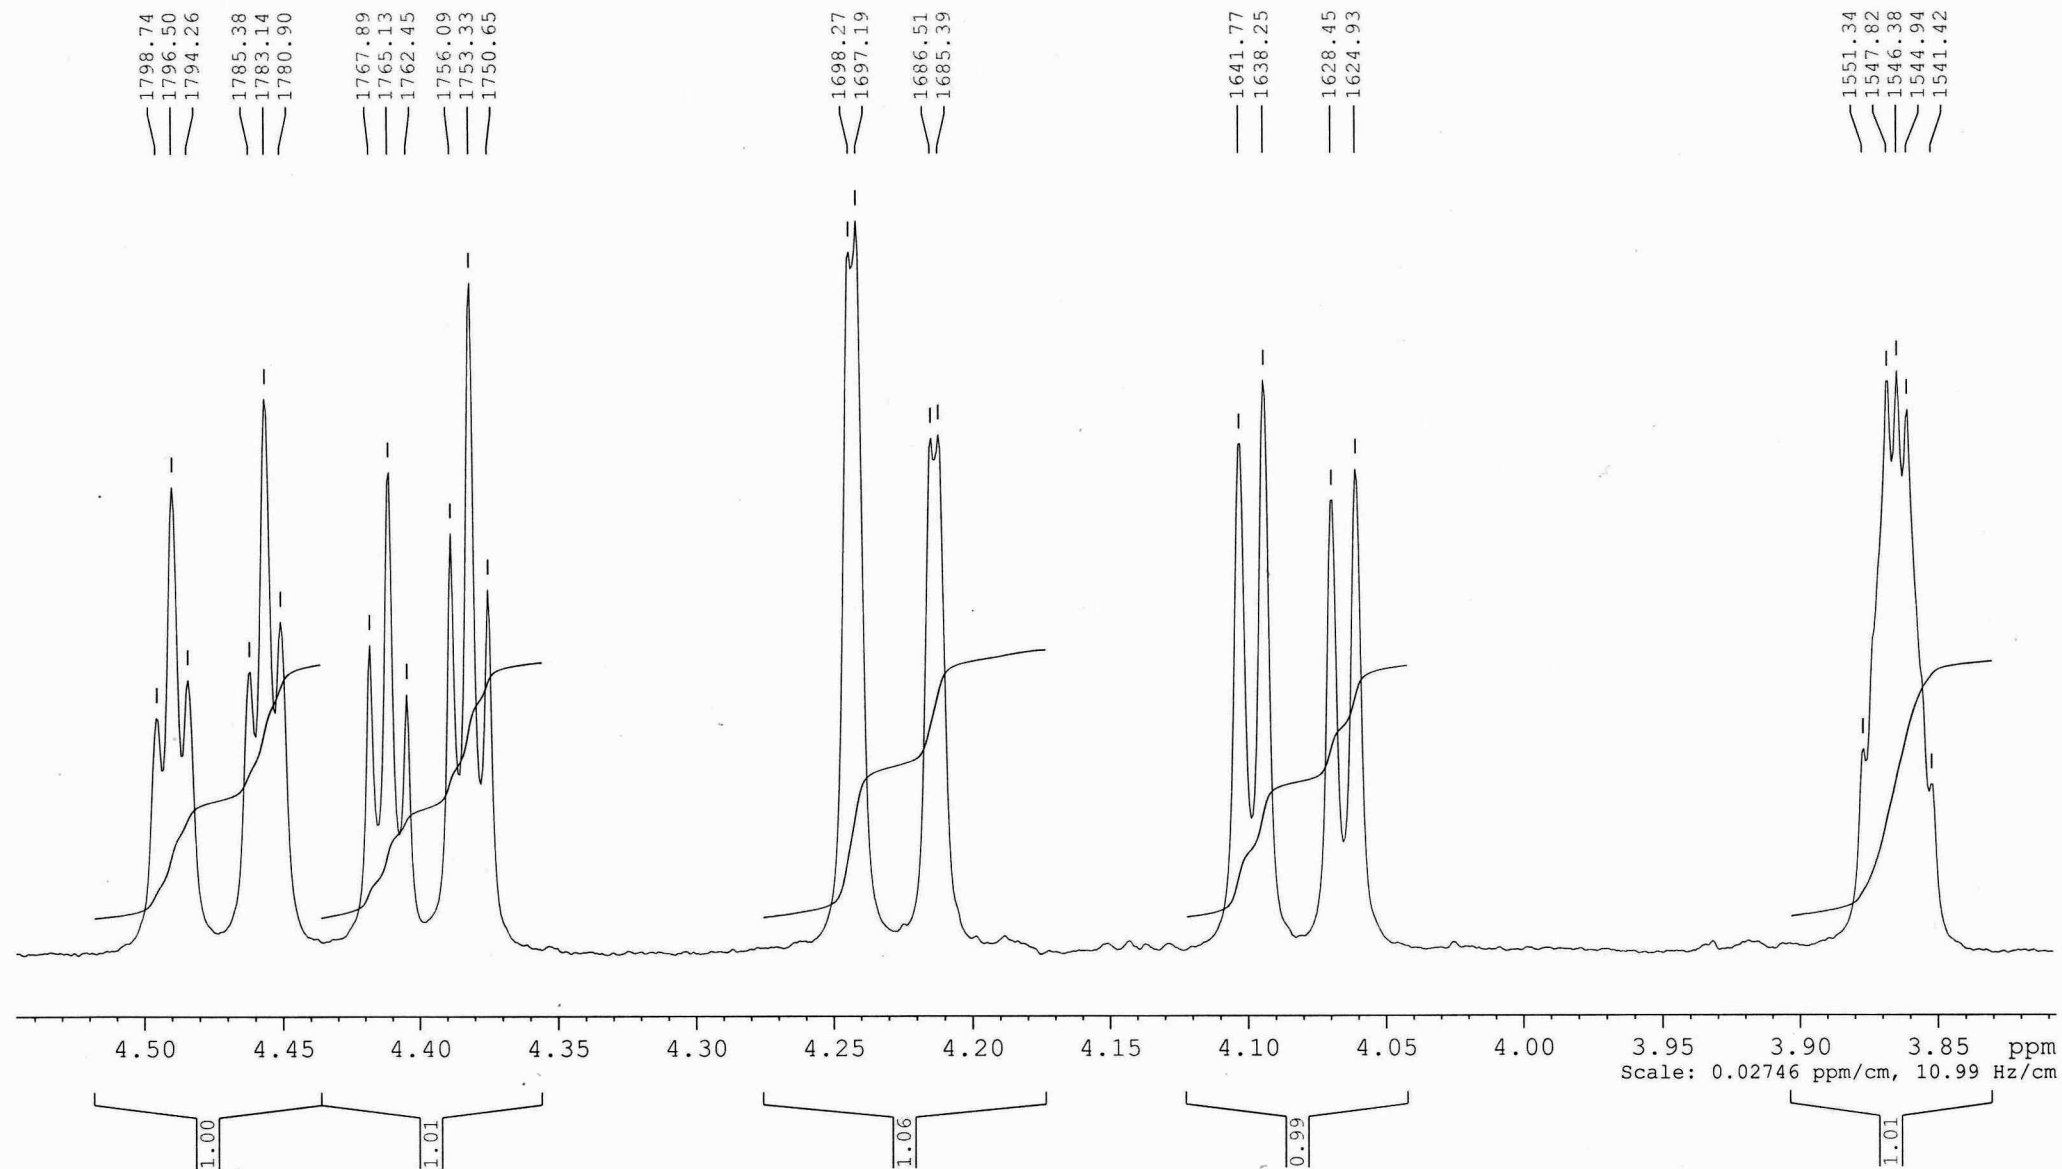

Compound IV

c:\user\FMHS-acsrchplc\Sep25-2009-FMHSacsrchplc\7\1  
Integral regions #4 to #5

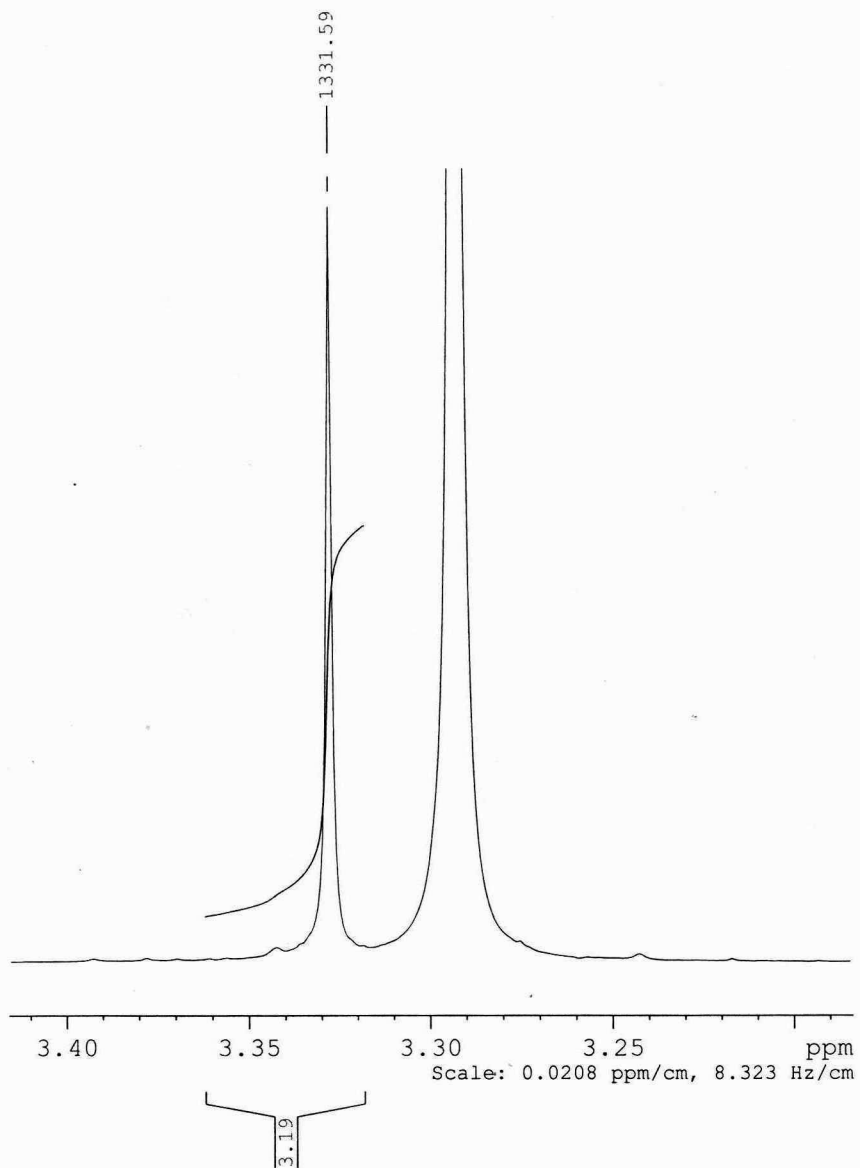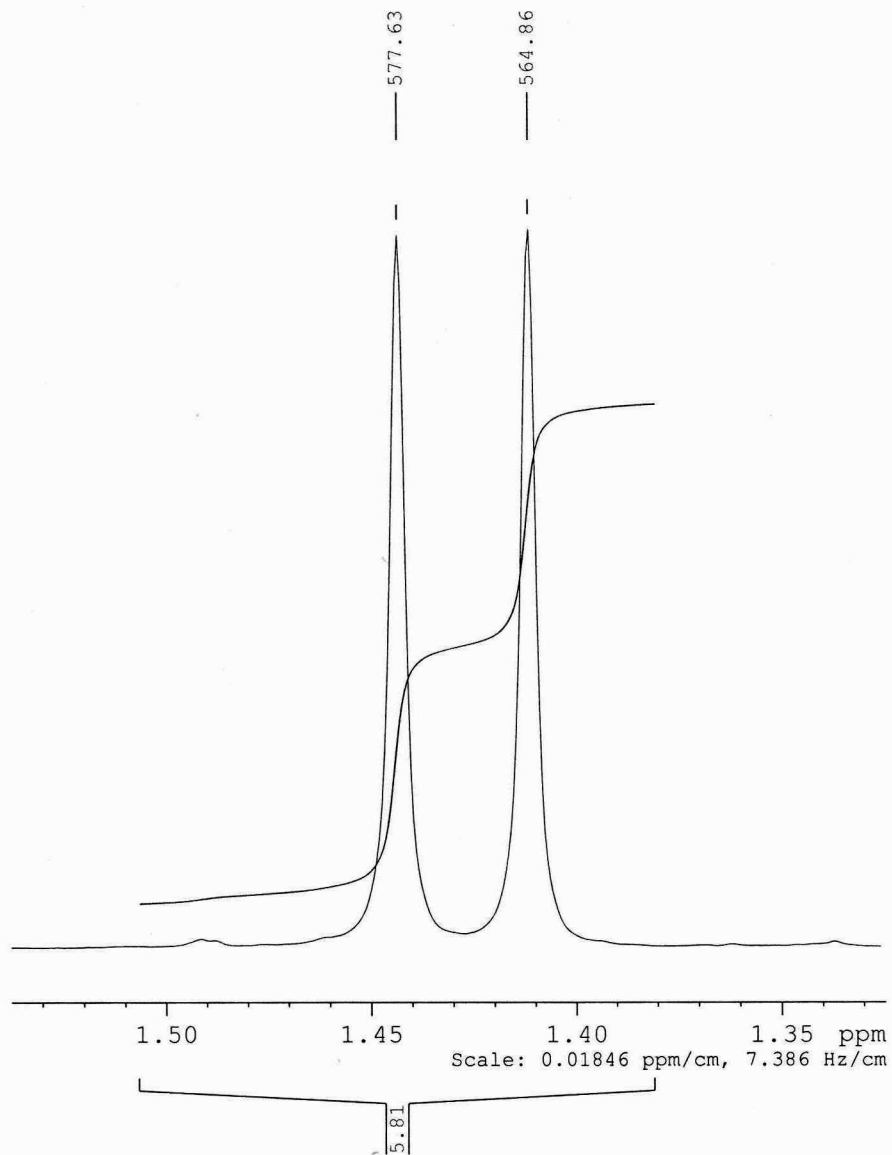

Compound IV D2O

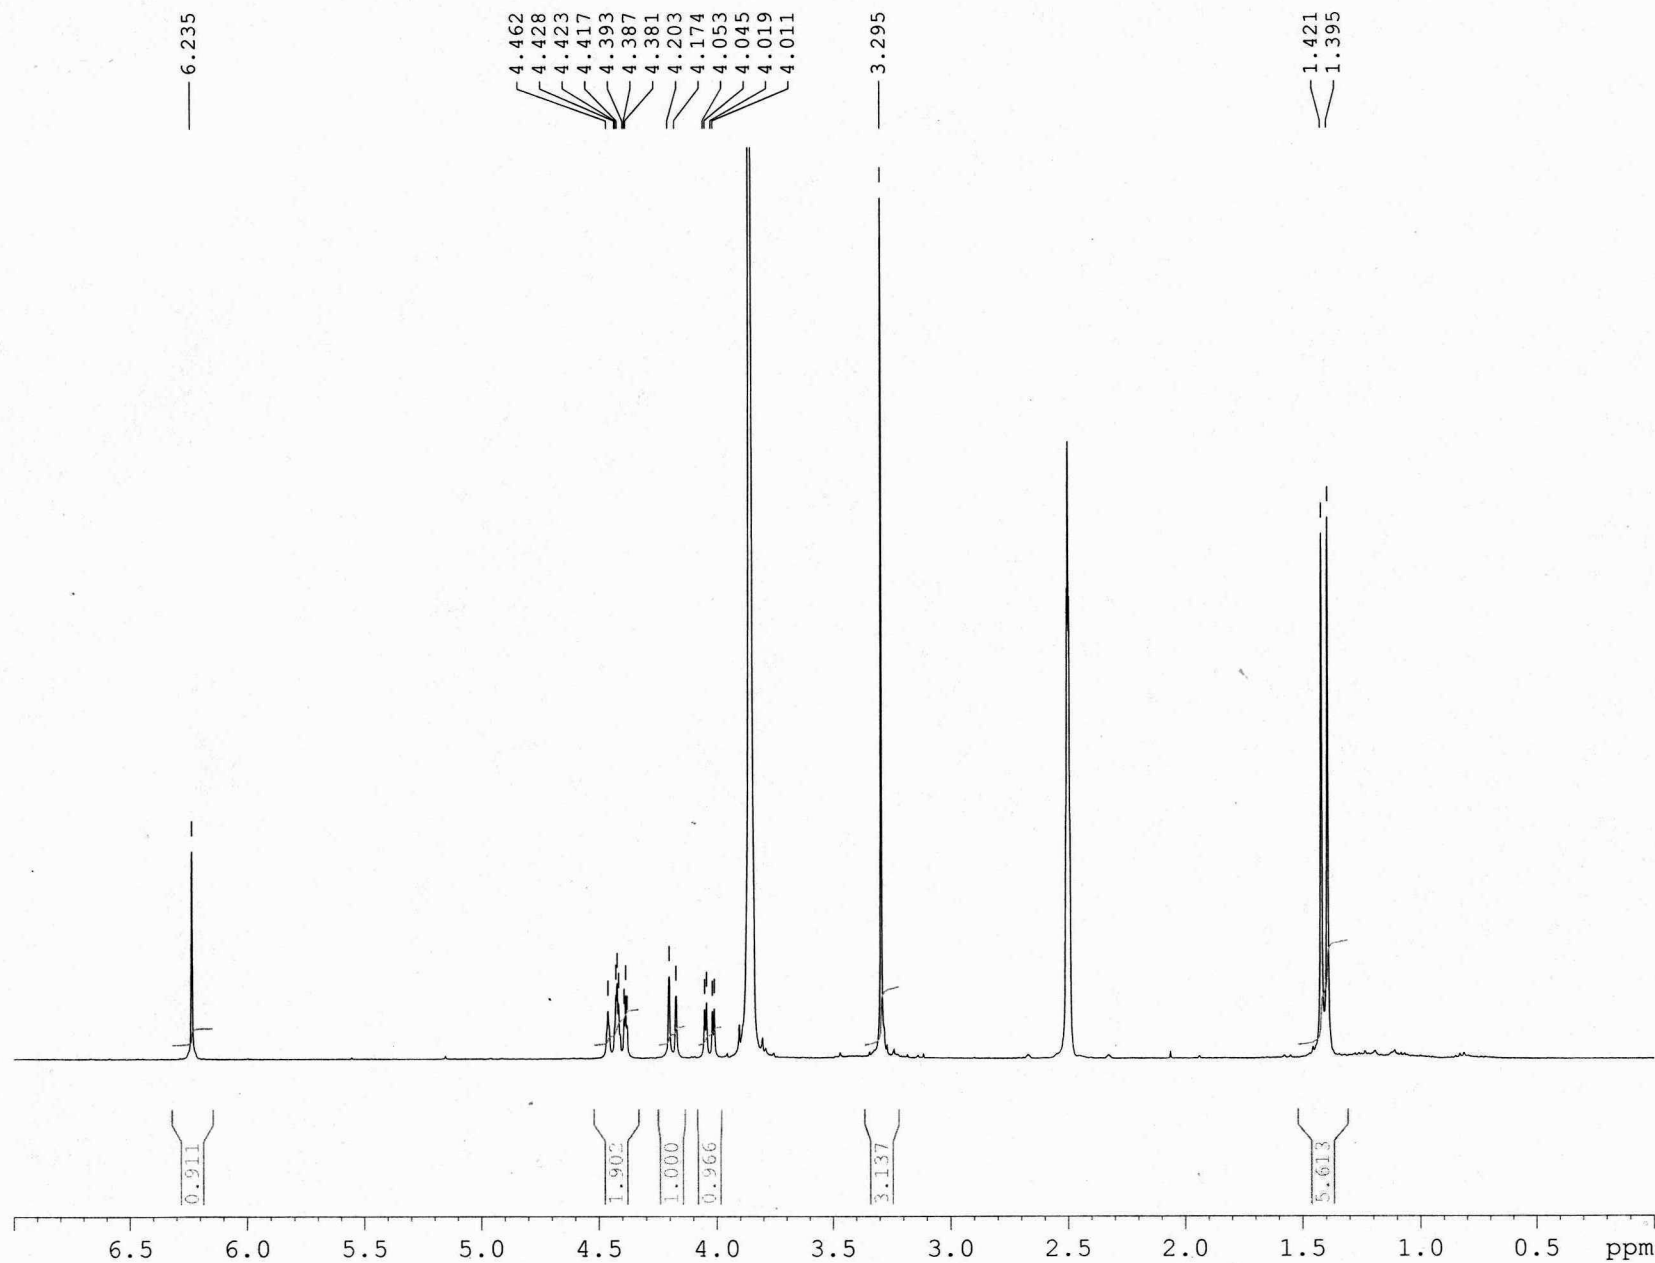

NAME Sep28-2009-FMHSacsrchplc  
EXPNO 12  
PROCNO 1  
Date\_ 20090928  
Time\_ 12.30  
INSTRUM spect  
PROBHD 5 mm BBO BB-1H  
PULPROG zg30  
TD 65536  
SOLVENT DMSO  
NS 64  
DS 2  
SWH 8389.262 Hz  
FIDRES 0.128010 Hz  
AQ 3.9059956 sec  
RG 362  
DW 59.600 usec  
DE 10.00 usec  
TE 303.0 K  
D1 2.00000000 sec  
TD0 1

===== CHANNEL f1 =====  
NUC1 1H  
P1 9.50 usec  
PL1 -3.00 dB  
SFO1 400.1334011 MHz  
SI 32768  
SF 400.1300025 MHz  
WDW EM  
SSB 0  
LB 0.30 Hz  
GB 0  
PC 1.00

Compound IV D2O

c:user/FMHS-acsrchplc/Sep28-2009-FMHSacsrchplc/12/1  
Integral regions #1 to #2

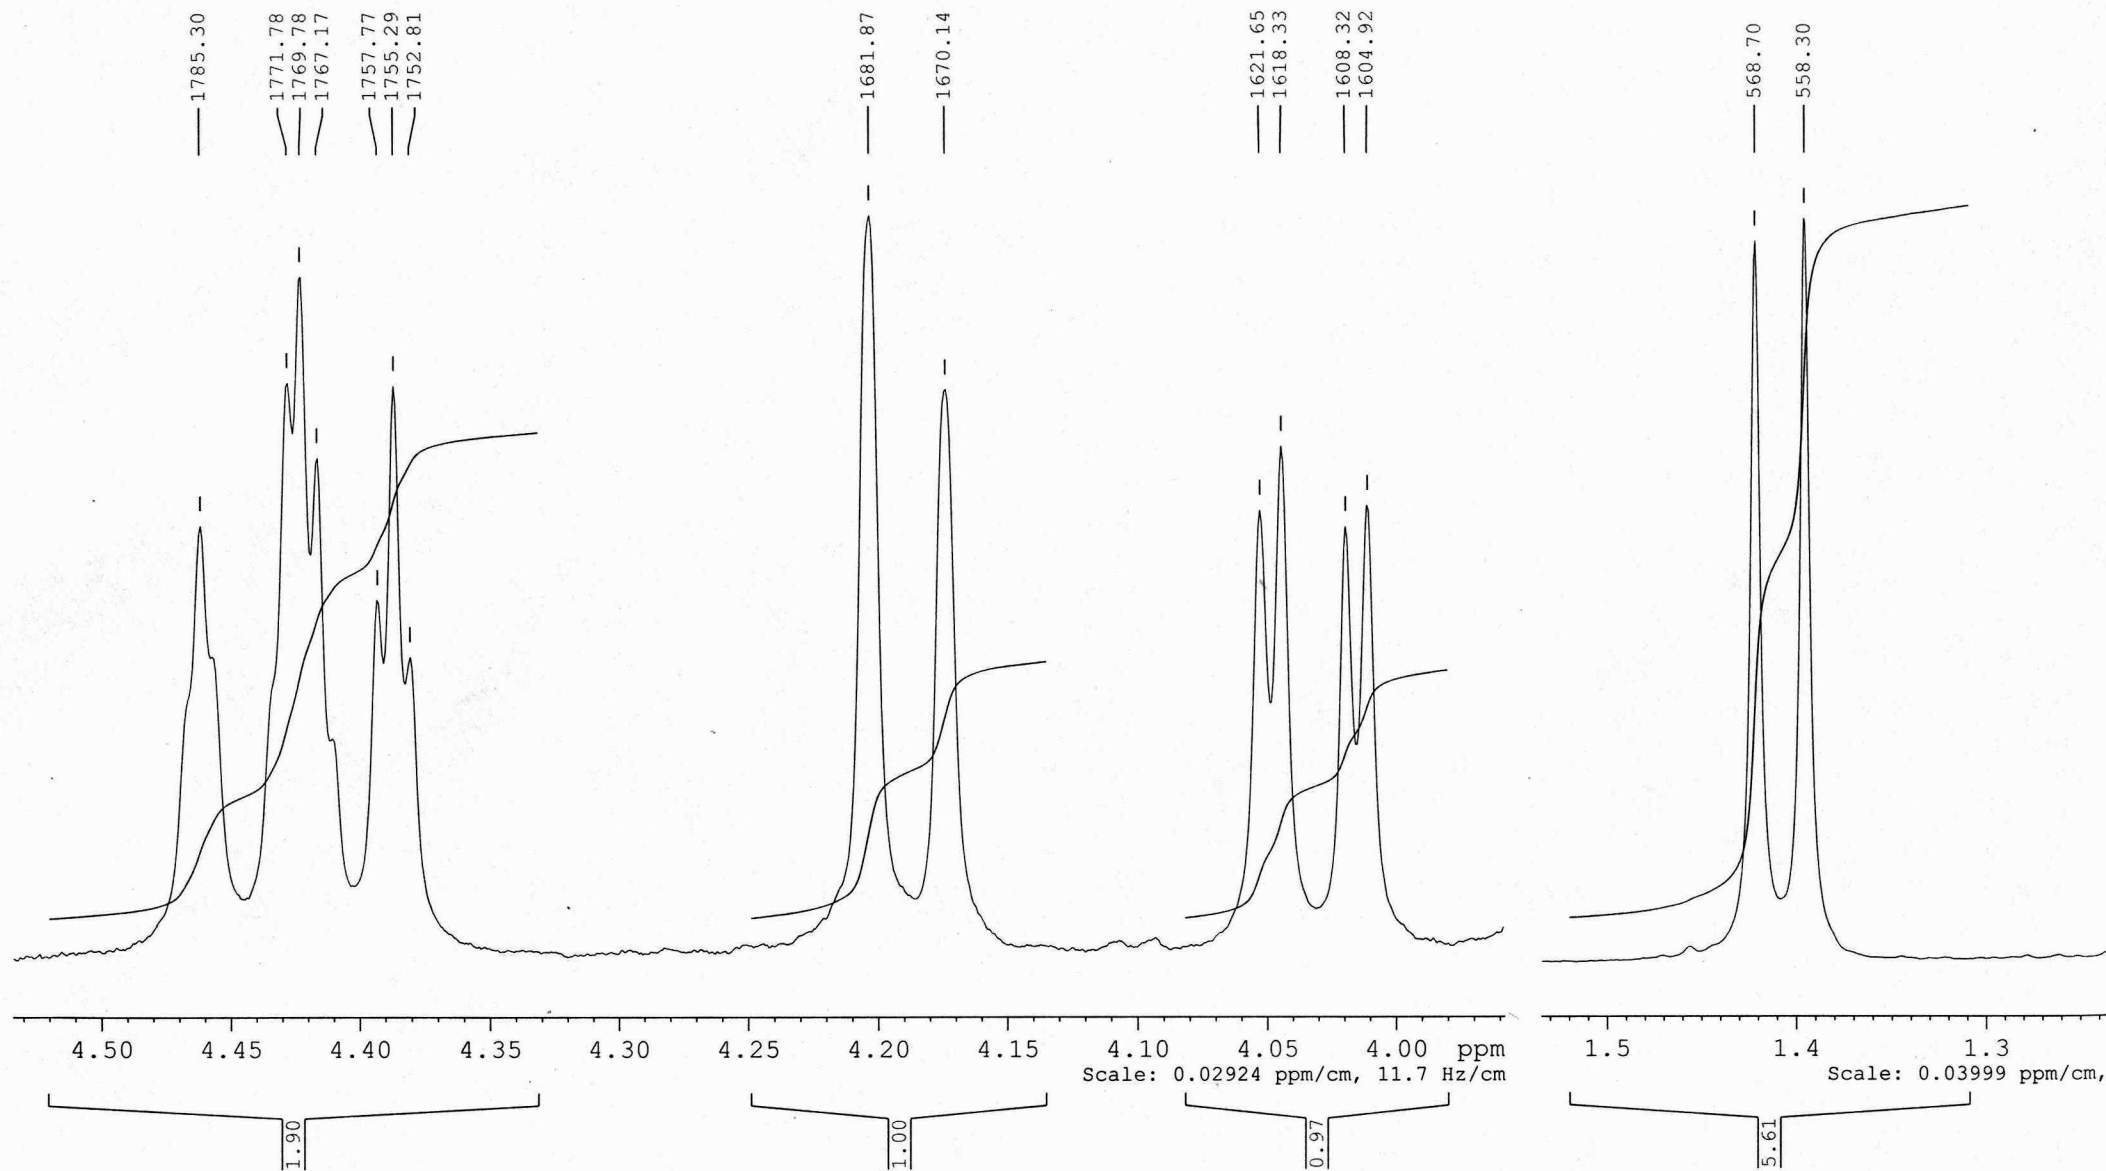

Supplement: b915877d.pdf [file b915877d.pdf]
